# Supplementary material for: Cell-free DNA mutations as biomarkers in breast cancer patients receiving tamoxifen
Source: Oncotarget. 2016 May 30;7(28):43412–8. doi: 10.18632/oncotarget.9727 (PMC5190033; doi:10.18632/oncotarget.9727)
Supplement: Supplementary file 5 [file oncotarget-07-43412-s005.xlsx]

## Sheet: Additional table A1
Clinicopathological factors:	Patient 1	Patient 2	Patient 3	Patient 4	Patient 5	Patient 6	Patient 7	Patient 8	Patient 9	Patient 10
pat_id	p7	p21	p8	p10	p16	p18	p3	p12	p20	p24
At diagnosis of early disease:
Age	64	50	43	43	48	58	62	51	52	61
Menopausal status	postmenopausal	premenopausal	premenopausal	premenopausal	premenopausal	postmenopausal	postmenopausal	premenopausal	premenopausal	postmenopausal
Lymph node status	positive	positive	positive	positive	positive	positive	positive	negative	negative	positive
Tumor size	≤20 mm	≤20 mm	>20mm	≤20 mm	>20mm	>20mm	>20mm	≤20 mm	>20mm	≤20 mm
Histology	IDC	IDC	IDC	Unknown	DCIS+IDC	DCIS+IDC	IDC	IDC	IDC	IDC
Grade	unknown	poor	poor	poor	good/moderate	poor	poor	poor	poor	good/moderate
Progesteron receptor status	positive	positive	negative	positive	positive	negative	positive	positive	positive	positive
Her2 status	unknown	unknown	negative	negative	positive	positive	unknown	unknown	unknown	negative
Treatment early disease:
Surgery	mastectomy	breast conserving	breast conserving	breast conserving	mastectomy	mastectomy	breast conserving	breast conserving	mastectomy	mastectomy
Radiotherapy	no	yes	yes	yes	no	yes	yes	yes	no	yes
Adjuvant chemotherapy	anthra	n-anthra	n-anthra	n-anthra	anthra	n-anthra	no	no	no	no
Clinical outcome:
Overall survival (in months)	134	113	187	177	177	87	108	127	71	123
Metastasis-free survival (in months)	96	55	124	107	52	54	87	105	29	69
At diagnosis of advanced disease:
Age	72	54	53	52	52	63	69	60	54	66
Menopausal status	postmenopausal	postmenopausal	postmenopausal	premenopausal	postmenopausal	postmenopausal	postmenopausal	postmenopausal	premenopausal	postmenopausal
First-line tamoxifen treatment outcome:
Progression-free survival (in months)	6	13	24	36	13	22	15	15	6	25
Response	SD≤6m	SD>6m	SD>6m	SD>6m	PR	SD>6m	SD>6m	SD>6m	SD≤6m	SD>6m
Determination of disease progression	Bone Scan	CT-Abdomen: livermeta	Bone Scan & X-ray skeleton	X-Ray and MRI pelvis	Increase SC-lymph nodes	Bone Scan	X-ray thorax and pelvis; Bone Scan	CT-Brain/Abdomen: Brain &liver meta	Bone Scan	MRI-twk
Yield and concentration cfDNA isolated from 400 µl serum taken at:
before/at start tamoxifen	6.7 ng (228 ng/ml)	8.6 ng (87 ng/ml)	5.7 ng (70 ng/ml)	6.2 ng (65 ng/ml)	19.2 ng (200 ng/ml)	9.2 ng (96 ng/ml)	5.9 ng (64 ng/ml)	7.0 ng (74 ng/ml)	13.6 ng (139 ng/ml)	2.7 ng (27 ng/ml)
during treatment	6.8 ng (70 ng/ml)	10.5 ng (107 ng/ml)	5.7 ng (92 ng/ml)	6.0 ng (63 ng/ml)	4.4 ng (61 ng/ml)	11.9 ng (127 ng/ml)	2.9 ng (32 ng/ml)	9.7 ng (102 ng/ml)	8.4 ng (86 ng/ml)	4.2 ng (43 ng/ml)
at disease progression	6.5 ng (66 ng/ml)	12.2 ng (124 ng/ml)	5.8 ng (80 ng/ml)	6.3 ng (67 ng/ml)	9.0 ng (113 ng/ml)	9.6 ng (99 ng/ml)	7.0 ng (76 ng/ml)	45.5 ng (484 ng/ml)	4.3 ng (44 ng/ml)	4.1 ng (57 ng/ml)

## Sheet: paper pat1 (wlpat7)
		Patient 7
												NGS	Snapshot
												mutations	PIK3CA
		Primary tumor:			mnr: 870627
		1987-07-29										PIK3CA H1047R	H1047R
		Adjuvant chemo
		CMF			date liquid biopsy	CA15.3-levels	therapy	serum_id	tamoxifen	cfDNA		NGS	Snapshot
										in pg	(pg/ul)	mutations	PIK3CA
					1992-12-09	17	adjuvant 4x FAC (5 aug 1987 tot 28 okt 1987)	CT89		1860			WT
					1993-06-09	21		DV78		8140	81.4		WT
					1994-06-08	26		FZ4		2485	71		WT
					1995-06-07	35		JH18		6680	228	PIK3CA_H1047R	H1047R
		Metastasis:
		1995-07-19			1995-07-19	34	start TAM 26 jul 1995	JP30
		Bone			1995-08-23	24		JU50	yes
					1995-09-20	30		JZ34	yes
		Start first-line tamoxifen			1995-10-18	31		KE38	yes	6840	69.8	PIK3CA_H1047R	H1047R
		1995-07-26			1995-11-22	34		KL24	yes
					1996-01-24	34	19 feb 1996 stop TAM, start megace	KV34	yes	6450	65.8	PIK3CA_H1047R	H1047R
		6 months, SD
					1996-03-19	46		LE58
					1996-04-16	36		LK18
		Progression:			1996-06-18	62		LU90
		1996-01-24			1996-08-13	67		ME15
		Bone
					1996-08-27	66	stop megace, start FAC	MG43
					1996-09-17	90		ML38
					1996-10-08	92		MO90
					1996-10-29	77		MS52
					1996-11-19	83		MW5
					1996-12-10	84	stop FAC (6x)	MZ25
					1997-01-28	87	7 jan 1997 start CMF	NH23
					1997-02-18	114		NL38
					1997-03-11	135		NO51
					1997-04-01	101		NR84
					1997-04-22	131		NV18
					1997-05-27	120		OA14
					1997-06-24	168	stop CMF (8x)	OE 87
					1997-07-22	143	29 jul 1997 start arimidex	OK29
					1997-08-26	138		OO60
					1997-09-23	136		OT72
					1997-11-04	182		PA35
					1998-01-06	208	3 feb 1998 stop arimidex	PJ53		7240			H1047R

## Sheet: paper pat2 (wlpat21)
	Patient 21
											NGS	Snapshot
											mutations	PIK3CA
	Primary tumor:			mnr: 920014							PIK3CA H1047R	H1047R
	1990-08-13
	Adjuvant Chemo (CMF)			date liquid biopsy	CA15.3-levels	therapy	serum_id	tamoxifen	cfDNA		NGS	Snapshot
									in pg	(pg/ul)	mutations	PIK3CA
				1993-09-06	14	4 feb 1992 tot 15 okt 1992 adj CMF (6x)	EJ52		4080	40.8		WT
				1993-12-06	10		EV58
				1994-02-28	7		FE68
				1995-04-24	24		JA27
				1995-08-14	31		JS86		3584	34.8		WT
				1995-12-11	44		KO42
				1996-02-12	56		KY25
				1996-06-27	81		LW69		8570	87.4	PIK3CA_WT	WT
	Metastasis:			1996-08-13	97	27 aug 1996 start TAM	ME32
	1996-08-13
	Pleura, other			1996-09-10	126		MK45	yes
				1996-10-01	123		MN73	yes
	Start first-line tamoxifen			1996-10-28	117		MS33	yes
	1996-08-27			1996-12-19	79		NB64	yes
				1997-02-04	74		NJ30	yes
	13 months, SD			1997-04-08	102		NT13	yes
				1997-06-10	107		OC98	yes	10470	106.8	PIK3CA_WT	WT
				1997-08-12	99		OM84	yes	12190	124.4	PIK3CA_WT	WT
	Progression:			1997-09-23	106	30 sep 1997 stop TAM, start megace	OT76	yes
	1997-09-30
	Liver, pleura, other			1997-10-14	131		OX55
				1997-11-11	106		PB28
				1997-12-09	69		PG5
				1998-01-20	41		PL88
				1999-10-25	107	jan 1999 stop megace, start arimidex tot mei 1999, jun 1999 start CMF	84B10
				1999-12-20	75	dec1999 stop CMF, start FAC (6x)	85B 3
				2000-02-21	87		85H 4
				2000-11-23	136	aug 2000 start taxotere (6x)	71A 3
				2001-02-01	95		91E 1
				2001-02-22	115	start vinorelbine	96C 9
				2001-03-15	144		99D 3

## Sheet: paper pat3(wlpat8)
		Patient 8
		Primary tumor:			mnr: 830500
		1983-07-04			PIK3CA WT
		Adjuvant chemo
		CMF
		Metastasis:
		1993-11-08
		Bone, skin			date liquid biopsy	CA15.3-levels	therapy	serum_id	tamoxifen	cfDNA		PIK3CA status
										in pg	(pg/ul)	snapshot	NGS
		Start first-line tamoxifen
		1993-12-06			1993-12-06	247	start TAM (adjuvant CMF gehad start 10 nov 1983)	EV61	yes	5670	70
					1994-01-10	377		FB33	yes
		24 months, SD			1994-02-28	324		FE49	yes
					1994-05-30	281		FX27	yes
					1994-08-01	368		GH8	yes
					1994-10-03	669		GS53	yes
					1995-01-23	718		HK74	yes
					1995-03-20	984		HU43	yes
					1995-05-22	960		JE100	yes
					1995-08-14	1342		JS80	yes	5700	92
		Progression:			1995-11-09	1852		KJ10	yes
		1995-12-01			1995-12-01	1774	stop TAM, 15 dec 1995 start FAC	KM100	yes	5780	80
		Bone
					1996-01-05	1603		KR100
					1996-01-19	1601		KU66
					1996-02-09	1199		KY8
					1996-03-01	719		LB83
					1996-03-29	713		LG48
					1996-04-19	330	26 apr 1996 laatst FAC (6x)	LK96
					1996-05-17	264	23 mei 1996 start megace	LP58
					1996-06-21	247		LV63
					1996-08-09	184		MD72
					1996-09-20	222		MM17
					01/okt/1996 (moet dit geen nov zijn?)	184		MT18
					1997-01-03	314		ND28
					1997-03-07	1437		NO21
					1997-03-21	1000		NQ74
					1997-05-28	1003	18 apr 1997 start CMF	OA64
					1997-06-27	731		OF64
					1997-07-25	525		OK82
					1997-08-22	599		OO11
					1997-09-19	610	stop CMF (6x)	OT61
					1997-10-17	618	24 okt 1997 start orimeten	OY33
					1997-11-21	805		PC76
					1998-01-09	904		PK18
					1998-03-03	1317		PS65
					1998-03-31	1564	stop orimeten, start 9 apr 1998 taxotere	PW47
					1998-04-28	1910		RA7
					1998-05-19	1533		RC28
					1998-06-16	1295		RF100
					1998-07-07	1356		RJ33
					1998-07-24	1154	27 jul 1998 stop taxotere	RL67
					1998-08-25	799		RP13
					1998-10-06	1037		RV61

## Sheet: paper pat4 (wlpat10)
	Patient 10
	Primary tumor:			mnr: 850481
	1985-06-06			PIK3CA WT
	Adjuvant chemo
	CMF			date liquid biopsy	CA15.3-levels	therapy	serum_id	tamoxifen	cfDNA		PIK3CA status
									in pg	(pg/ul)	snapshot	NGS
	Metastasis:
	1994-05-06			1994-05-20	111	adjuvant CMF (set1985 tot mrt1986), start TAM 20 jun 1994	FW8		6220	64.8
	Bone
				1994-09-21	40		GQ53	yes
	Start first-line tamoxifen			1994-11-16	26		GZ81	yes
	1994-06-15			1995-02-15	22		HO66	yes
				1995-05-10	21		JD14	yes
	36 months, SD			1995-08-09	23		JS10	yes
				1995-11-15	32		KJ94	yes
				1995-12-13	29		KO93	yes
				1996-02-06	23		KX21	yes
				1996-03-19	26		LE43	yes
				1996-04-23	25		LL46	yes
				1996-06-11	25		LT65	yes
				1996-08-20	27		MF25	yes
				1996-09-10	34		MK48	yes
				1996-10-04	39		MO58	yes
				1996-11-19	49		MW1	yes
				1997-02-04	63		NJ32	yes	6000	63.2
				1997-04-01	118		NS8	yes
	Progression:			1997-06-05	262	26 jun 1997 stop TAM, start megace	OC8	yes	6250	67.2
	1997-06-26
	Bone			1997-07-17	278		OJ60
				1997-08-14	164	19 aug 1997 stop megace, start FAC	ON8
				1997-09-30	42		OV84
				1997-11-06	34	27 okt 1997 stop FAC (PD), 20 nov 1997 start taxotere (1x)	PA62
				1997-12-04	15	3 dec 1997 start arimidex	PE28
				1998-01-20	26		PL95
				1998-02-24	18		PR91
				1998-04-07	27		PX42
				1998-04-03	21		PX7
				1998-10-06	126		RV41
				1999-02-02	231		SM98
				1999-03-18	316		SU66
				1999-03-24	294		SV25
				1999-04-27	433	4 mei 1999 start FAC	SZ75
				1999-05-25	384		TD20
				1999-06-15	201		TG2
				1999-07-06	137		TJ85
				1999-07-27	115		TO11
				1999-08-24	55	stop FAC (6x)	TR55
				1999-09-14	53	start megace	TU28
				1999-10-26	63		UA5

## Sheet: paper pat5 (wlpat16)
		Patient 16
		Primary tumor:			mnr: 900354
		1990-05-02			PIK3CA WT
		Adjuvant chemo (CAF)
					date liquid biopsy	CA15.3-levels	therapy	serum_id	tamoxifen	cfDNA		PIK3CA status
										in pg	(pg/ul)	snapshot	NGS
		Metastasis:
		1994-09-02			1994-10-12	15	14 mei 1990 tot 06 aug 1990 adjuvant FAC	EZE 9	yes	19200	200			PITX2-Nijm sep'06
		Other
		Start first-line tamoxifen
		1994-10-12			1994-10-12	15	start TAM	EZE 8	yes					PITX2-Nijm sep'06
					1994-11-09	22		GY72	yes
		13 months, PR			1994-12-14	27		EZE11	yes					PITX2-Nijm sep'06
					1994-12-14	27		EZE10	yes					PITX2-Nijm sep'06
					1995-02-15	35		HO74	yes
					1995-04-19	38		EZF 7	yes					PITX2-Nijm sep'06
					1995-04-19	38		EZF 6	yes					PITX2-Nijm sep'06
					1995-06-14	46		JJ43	yes	4410	61.2
					1995-08-02	46		EZG 1	yes					PITX2-Nijm sep'06
					1995-08-02	46		EZF12	yes					PITX2-Nijm sep'06
					1995-10-04	58		KB81	yes	9040	113
		Progression:
		1995-10-31
		Other			1995-11-17	89	stop TAM, start megace (stop 11 mei 2000)	EZG 3						PITX2-Nijm sep'06
					1995-11-17	89		EZG 2						PITX2-Nijm sep'06
					1996-01-03	83		KR43
					1996-01-26	119		KV85
					1996-03-15	91		LE12
					1996-05-10	94		LO48
					1996-08-13	71		ME25
					1996-10-11	71		MP64
					1996-12-17	62		NB25
					1997-04-29	56		NW59
					1997-07-15	44		OJ39
					1997-09-19	53		OT55
					1998-01-13	39		PK80
					1998-04-24	40		PZ77
					1998-05-29	39		RD72
					1998-08-11	46		RN68
					1999-02-09	37		SO24
					1999-07-27	45		TO36
					1999-11-26	32		UE61

## Sheet: paper pat6 (wlpat18)
		Patient 18
		Primary tumor:			mnr: 900357
		1990-05-30			PIK3CA WT
		Adjuvant chemo (CMF)
					date liquid biopsy	CA15.3-levels	therapy	serum_id	tamoxifen	cfDNA		PIK3CA status
										in pg	(pg/ul)	snapshot	NGS
		Metastasis:
		1994-11-24			1991-07-02	9	19 jun 1990 tot 4 dec 1990 adj CMF	AD100
		Bone
		Start first-line tamoxifen			1994-12-05	197	15 dec 1994 start TAM	HC35	yes	9180	95.6
		1994-12-15
					1995-02-03	132		HM80	yes
		22 months, SD			1995-03-03	95		HR64	yes
					1995-04-13	43		HZ8	yes
					1995-06-01	75		JG60	yes
					1995-07-20	54		JP74	yes
					1995-09-14	67		JY56	yes
					1995-11-23	141		KL54	yes
					1995-12-14	171		KP32	yes
					1996-01-25	223		KV73	yes
					1996-03-28	212		LG35	yes
					1996-04-25	158		LM35	yes	11920	126.8
					1996-06-06	283		LT4	yes
					1996-07-18	268		MA15	yes
					1996-08-29	330		MH26	yes
		Progression:			1996-10-10	467	29 okt 1996 stop TAM, start megace	MP34	yes	9600	99
		1996-10-29
		Bone			1996-12-05	592		NA10
					1997-01-02	449		ND3
					1997-02-20	650		NL87
					1997-03-25	586		NR29
					1997-05-01	632	20 mei 1997 stop megace, start orimeten	NW83
					1997-06-19	857		OE 31
					1997-06-23	932	10 jul 1997 stop orimeten	OE 75

## Sheet: paper pat7 (wlpat3)
	Patient 3
	Primary tumor:			mnr: 870223
	1987-03-30			PIK3CA H1047L
	No adjuvant therapy
				date liquid biopsy	CA15.3-levels	therapy	serum_id	tamoxifen	cfDNA		PIK3CA status
	Metastasis:								in pg	(pg/ul)	snapshot	NGS
	1994-06-16
	Bone, lungs
	Start first-line tamoxifen
	1994-06-20			1994-06-20	91	start TAM	GB45	yes	5850	63.6	WT
				1994-07-05	72		GF21	yes
				1994-08-02	63		GH23	yes
	15 months, SD			1994-09-13	44		GP22	yes
				1995-03-22	88		HU76	yes
				1995-05-16	71		JD98	yes
				1995-06-06	78		JG94	yes	2960	31.8
				1995-09-26	190		KA38	yes	7030	75.8
	Progression:					stop TAM, start megace
	1995-10-02
	Bone, lungs			1995-10-31	351		KG34
				1995-11-28	352		KM7

## Sheet: paper pat 8 (wlpat12)
	Patient 12
	Primary tumor:			mnr: 870609
	1987-07-20			PIK3CA WT
	No adjuvant therapy
				date liquid biopsy	CA15.3-levels	therapy	serum_id	tamoxifen	cfDNA		PIK3CA status
									in pg	(pg/ul)	snapshot	NGS
	Metastasis:
	1996-04-16			1996-04-19	17	start TAM 15 mei 1996	LK98		7050	74.2
	Lungs, other
				1996-07-24	21		MA94	yes
	Start first-line tamoxifen			1996-09-25	17		MM98	yes
	1996-05-15			1996-12-18	16		NB41	yes
				1997-02-19	19		NL62	yes
	15 months, SD			1997-04-23	22		NV57	yes
				1997-06-25	34		OF30	yes	9710	102.2
	Progression:
	1997-08-13			1997-08-27	36		OO93	yes	45500	484
	Lungs, liver, brain, other)
				1997-10-22	81	2 okt 1997 startFAC (5x)	OY78
				1997-11-12	54		PB49
				1997-12-03	41		PE19
				1997-12-30	51		PH91
				1998-01-15	40	2 jan 1998 stop FAC	PL8
				1998-02-04	15		PO8

## Sheet: paper pat9 (wlpat20)
	Patient 20
	Primary tumor:			mnr: 900556
	1990-08-13			PIK3CA WT
				date liquid biopsy	CA15.3-levels	therapy	serum_id	tamoxifen	cfDNA		PIK3CA status
	No adjuvant therapy								in pg	(pg/ul)	snapshot	NGS
				1993-01-26	55		DB52
	Metastasis:
	1993-03-04
	Bone
	Start first-line tamoxifen
	1993-03-18			1993-03-18	52	start TAM	DK57	yes	13660	139.4
				1993-04-15	53		DO88	yes
	6 months, SD			1993-05-13	44		DT64	yes
				1993-06-10	60		DW7	yes	8450	86.2
				1993-07-23	48		EB2	yes
	Progression:			1993-09-03	45	14 sep 1993 stop TAM , start FEC	EJ44	yes	4330	44.2
	1993-09-14
	Bone			1993-10-08	44		EN7
				1993-10-28	50		ER34
				1993-11-26	178		EU82
				1993-12-17	43		EY77
				1994-01-07	40		FA55
				1994-03-11	30		FG58
				1994-01-28	33		FJ12
				1994-04-01	36		FO23
				1994-04-08	46		FP17
				1994-04-29	31		FS78
				1994-05-30	30		FX30
				1994-06-17	37		GB35
				1994-07-15	33		GF3
				1994-08-05	22		GJ12
				1994-08-26	42		GM53
				1994-09-23	41		GR6
				1994-10-14	36	stop FEC (18x), 11 nov 1994 start CMF	GU65
				1994-12-02	46		HC22
				1995-02-09	80		HN89
				1995-03-23	129		HV6
				1995-04-21	114	2 mei 1995 stop CMF (7x), 24 mei 1995 start megace	HZ93
				1995-06-02	175		JG77
				1995-06-30	92		JM49
				1995-07-28	55		JQ55
				1995-09-08	63		JX44
				1995-11-10	78		KJ27
				1995-12-01	84	4 dec 1995 stop megace	KM91
				1996-01-04	70	start taxotere (2x)	KR61
				1996-01-25	79		KV51
				1996-03-29	85		LG50
				1996-05-23	633	6 jun 1996 start taxol (1x)	LQ36
				1996-06-28	1192		LX1

[truncated: 1 more sheets: paper pat10 (wlpat24)]
