# Supplementary material for: Cell-free DNA mutations as biomarkers in breast cancer patients receiving tamoxifen
Source: Oncotarget. 2016 May 30;7(28):43412–8. doi: 10.18632/oncotarget.9727 (PMC5190033; doi:10.18632/oncotarget.9727)
Supplement: Supplementary file 6 [file oncotarget-07-43412-s006.xlsx]

## Sheet: Additional Table A5
	Patient ID	Sample	SampleID	DNA concentration (pg/ul)	amount DNA in library preparation (in pg)	amount DNA library pool sequenced (in pM)	Genomic equivalents	Limit of Detection
	1	Ss	JH18	228	394.8	458.121	64.7213	0.0154509
		St	KE38	69.8	394.8	163.536	64.7213	0.0154509
		Sp	KV34	65.8	394.8	99.639	64.7213	0.0154509
	2	Ss	LW69	87.4	524.4	114.995	85.9672	0.0116323
		St	OC98	106.8	524.4	157.186	85.9672	0.0116323
		Sp	OM84	124.4	524.4	132.865	85.9672	0.0116323
	3	Ss	EV61	70	420	366.695	68.8525	0.0145238
		St	JS80	92	420	352.103	68.8525	0.0145238
		Sp	KM100	80	420	682.547	68.8525	0.0145238
	4	Ss	FW8	64.8	379.2	185.106	62.1639	0.0160865
		St	NJ32	63.2	379.2	404.61	62.1639	0.0160865
		Sp	OC8	67.2	379.2	640.08	62.1639	0.0160865
	5	Ss	EZE9	200	367.2	812.778	60.1967	0.0166122
		St	JJ43	61.2	367.2	586.709	60.1967	0.0166122
		Sp	KB81	113	367.2	472.632	60.1967	0.0166122
	6	Ss	HC35	95.6	573.6	623.34	94.0328	0.0106346
		St	LM35	126.8	573.6	746.002	94.0328	0.0106346
		Sp	MP34	99	573.6	679.287	94.0328	0.0106346
	7	Ss	GB45	63.6	250	189.5	40.9836	0.0244
		St	JG94	31.8	190.8	128	31.2787	0.0319706
		Sp	KA38	75.8	250	313.264	40.9836	0.0244
	8	Ss	LK98	74.2	445.2	699.399	72.9836	0.0137017
		St	OF40	102.2	445.2	809.127	72.9836	0.0137017
		Sp	OO93	484	445.2	758.243	72.9836	0.0137017
	9	Ss	DK57	139.4	265.2	299.322	43.4754	0.0230015
		St	DW7	86.2	265.2	376.874	43.4754	0.0230015
		Sp	EJ44	44.2	265.2	340.928	43.4754	0.0230015
	10	Ss	BT30	27.6	165.6	78	27.1475	0.0368357
		St	FG97	43	250	115	40.9836	0.0244
		Sp	FZ20	57.8	250	183.022	40.9836	0.0244
