# Supplementary material for: Cell-free DNA mutations as biomarkers in breast cancer patients receiving tamoxifen
Source: Oncotarget. 2016 May 30;7(28):43412–8. doi: 10.18632/oncotarget.9727 (PMC5190033; doi:10.18632/oncotarget.9727)
Supplement: Supplementary file 7 [file oncotarget-07-43412-s007.xlsx]

## Sheet: Additional Table A6
	Digital PCR				Input DNA (in pg)			Genomic equivalents			Limit of Detection			Number of copies/µl			Measured Mutant Allele Frequency (MAF)
	Mutation Assay	Patient ID	Sample		Qubit	dPCR		Qubit	dPCR		Qubit	dPCR		Mutant (FAM)	Wildtype (VIC)		MAF in %	95% Confidence Interval		Chip
	PIK3CA p.H1047R	1	pT		11868	14849.4		1945.57	2434.33		0.000513987	0.000410791		102.39	156.22		0.39593	37.082% - 42.236%		B95NFL_141030_164943.eds
			S1		393.6	477.505		64.5246	78.2795		0.015498	0.0127747		0	8.316		0	NA		B9M469_141030_165030.eds
			S1		250	348.482		40.9836	57.1282		0.0244	0.0175045		0	6.069		0	NA		B95JUV_141103_170523.eds
			S2		506.4	605.775		83.0164	99.3074		0.0120458	0.0100697		0.0629	10.487		0.00596	0.104% - 3.392%		B9M5U0_141030_165129.eds
			S2		250	280.089		40.9836	45.9162		0.0244	0.0217788		0.0869	4.791		0.01782	0.309% - 10.224%		B95LPT_141103_170609.eds
			S3		426	452.757		69.8361	74.2224		0.0143192	0.013473		0.195	7.69		0.02472	0.828% - 7.358%		B9M69F_141030_165219.eds
			S3		250	306.278		40.9836	50.2096		0.0244	0.0199165		0.122	5.212		0.02294	0.619% - 8.476%		B95K35_141103_170654.eds
			S4		283.8	208.228		46.5246	34.1357		0.021494	0.0292948		0.0754	3.551		0.0208	0.36% - 11.958%		B9N77F_141030_165350.eds
			S4		250	168.987		40.9836	27.7028		0.0244	0.0360974		0.245	2.698		0.08325	3.118% - 22.193%		B95LEH_141103_170903.eds
			Ss		456	1760.78		74.7541	288.653		0.0133772	0.00346437		13.068	17.597		0.42616	36.323% - 49.96%		B9M6MT_141030_165304.eds
			Ss		250	991.529		40.9836	162.546		0.0244	0.00615212		8.599	8.669		0.49798	40.073% - 61.826%		B95L36_141103_170749.eds
			St		418.8	290.66		68.6557	47.6492		0.0145654	0.0209867		0.998	4.064		0.19716	11.391% - 34.083%		B9M144_141030_165435.eds
			St		250	191.151		40.9836	31.3363		0.0244	0.0319119		1.24	2.089		0.37246	22.091% - 62.732%		B95PHP_141103_170955.eds
			Sp		394.8	333.323		64.7213	54.6431		0.0154509	0.0183006		1.107	4.698		0.19077	11.401% - 31.885%		B95LV0_141030_165523.eds
			Sp		250	166.863		40.9836	27.3545		0.0244	0.036557		0.528	2.378		0.1817	7.791% - 42.293%		B95PLT_141103_171047.eds
		2	pT		9213	6827.75		1510.33	1119.3		0.000662108	0.000893412		8.089	110.82		0.06803	5.666% - 8.157%		BEJU3Y_141203_155559.eds
			pT		5550	4315.92		909.836	707.527		0.0010991	0.00141337		6.044	69.12		0.0804	6.426% - 10.048%		150518_192213_BDYX3D.eds
			S1		288.84	345.875		47.3508	56.7008		0.021119	0.0176364		0.0626	5.961		0.01039	0.181% - 5.93%		BCVK95_141203_155659.eds
			S1		278.4	359.909		45.6393	59.0014		0.0219109	0.0169487		0	6.268		0	NA		150518_192337_BDYJXU.eds
			Ss		725.42	640.865		118.921	105.06		0.00840892	0.00951839		0	11.161		0	NA		BCVJ50_141203_155801.eds
			Ss		699.2	606.7		114.623	99.459		0.00872426	0.0100544		0	10.566		0	NA		150518_192859_BDYG2X.eds
			St		886.44	888.574		145.318	145.668		0.00688146	0.00686493		0	15.475		0	NA		BCVFH8_141203_155902.eds
			St		854.4	827.135		140.066	135.596		0.00713951	0.00737485		0	14.405		0	NA		150518_192531_BDYD81.eds
			Sp		1032.52	780.395		169.266	127.934		0.00590788	0.00781655		0	13.591		0	NA		BCVG70_141203_160000.eds
			Sp		995.2	743.359		163.148	121.862		0.00612942	0.00820599		0	12.946		0	NA		150518_192626_BDYHKG.eds
		3	pT		10000	24736		1639.34	4055.08		0.00061	0.000246605		0	430.79		0	NA		151008_114331_C00B5C.eds
			pT		30000	28970.1		4918.03	4749.2		0.000203333	0.000210562		0	504.53		0	NA		151021_105857_C018FT.eds
		4	pT		10000	14459.9		1639.34	2370.47		0.00061	0.000421857		0.0763	251.75		0.000303	5.23E-3% - 0.172%		151008_114515_C01B4H.eds
			pT		30000	47698.9		4918.03	7819.48		0.000203333	0.000127886		0.531	830.17		0.000639	3.05E-2% - 0.133%		151021_105959_C00TDN.eds
		5	pT		10000	1024.09		1639.34	167.883		0.00061	0.00595653		0	17.835		0	NA		151008_114739_C00S5Q.eds
			pT		30000	47148.7		4918.03	7729.3		0.000203333	0.000129378		0	821.12		0	NA		151021_110201_C019SD.eds
		6	pT		10000	18771.2		1639.34	3077.24		0.00061	0.000324966		0	326.91		0	NA		151008_114900_C01689.eds
			pT		30000	29634.5		4918.03	4858.11		0.000203333	0.000205841		0	516.1		0	NA		151021_110259_C016I6.eds
		7	pT		10000	2277.28		1639.34	373.324		0.00061	0.00267864		0	39.66		0	NA		151008_114235_C00B1V.eds
			pT		30000	23008.2		4918.03	3771.84		0.000203333	0.000265123		0	400.7		0	NA		151021_105803_C015XX.eds
		8	pT		10000	1104.07		1639.34	180.995		0.00061	0.005525		0	19.228		0	NA		151008_114616_C01BER.eds
			pT		30000	39480.8		4918.03	6472.27		0.000203333	0.000154505		0	687.58		0	NA		151021_110058_C016HG.eds
		9	pT		10000	847.462		1639.34	138.928		0.00061	0.00719796		0	14.759		0	NA		151008_114959_C00V0A.eds
			pT		30000	32866.1		4918.03	5387.88		0.000203333	0.000185602		0	572.38		0	NA		151021_110358_C015XY.eds
		10	pT		10000	6480.82		1639.34	1062.43		0.00061	0.000941238		0.077	112.79		0.000682	1.19E-2% - 0.387%		151008_115119_C00W0Z.eds
			pT		30000	19323.2		4918.03	3167.75		0.000203333	0.000315682		0.0747	336.45		0.000222	3.82E-3% - 0.126%		151021_110458_C015XQ.eds
	PIK3CA p.H1047L	7	pT		4995	5754.35		818.852	943.335		0.00122122	0.00106007		24.086	76.129		0.2403	14.716% - 38.503%		150512_090744_BDYHEA.eds
			pT		4995	4762.87		818.852	780.799		0.00122122	0.00128074		19.752	63.196		0.23813	20.775% - 27.265%		150513_121507_BDYRY4.eds
			Sp		606.4	598.202		99.4098	98.0658		0.0100594	0.0101972		1.513	8.905		0.1452	8.48% - 24.823%		150512_093152_BDYTMU.eds
			Sp		606.4	759.207		99.4098	124.46		0.0100594	0.0080347		0.481	12.741		0.0364	1.641% - 8.054%		150518_191940_BDYGMH.eds
			Ss		508.8	593.149		83.4098	97.2375		0.011989	0.0102841		0	10.33		0	NA		150512_090835_BDYTCJ.eds
			Ss		254.4	313.685		41.7049	51.4238		0.023978	0.0194462		0	5.463		0	NA		150513_121658_BDYY5G.eds
			St		254.4	1524.44		41.7049	249.909		0.023978	0.00400146		0	26.549		0	NA		150512_090916_BDYFYR.eds
			St		508.8	630.07		83.4098	103.29		0.011989	0.00968147		0.217	10.756		0.0198	0.664% - 5.875%		150518_191849_BDYXT4.eds
			Sp		606.4	598.202		99.4098	98.0658		0.0100594	0.0101972		1.513	8.905		0.1452	8.48% - 24.823%		150512_093152_BDYTMU.eds
			Sp		606.4	759.207		99.4098	124.46		0.0100594	0.0080347		0.481	12.741		0.0364	1.641% - 8.054%		150518_191940_BDYGMH.eds
		10	pT		10464	12277.5		1715.41	2012.71		0.000582951	0.000496842		91.8	122.02		0.4293	39.056% - 47.118%		150512_091049_BDYT7E.eds
			pT		10464	12572.7		1715.41	2061.1		0.000582951	0.000485179		111.52	107.44		0.5093	47.662% - 54.373%		150513_121920_BDYRRY.eds
			Ss		220.8	70.7989		36.1967	11.6064		0.0276268	0.0861596		0	1.233		0	NA		150512_093307_BDYCYN.eds
			Ss		220.8	186.649		36.1967	30.5983		0.0276268	0.0326816		0.0706	3.18		0.02171	0.376% - 12.488%		150513_122029_BDYHGD.eds
			St		344	460.91		56.3934	75.5591		0.0177326	0.0132347		0	8.027		0	NA		150512_093353_BDYTPX.eds
			St		344	318.451		56.3934	52.2051		0.0177326	0.0191552		0	5.546		0	NA		150513_122122_BDYHRN.eds
			Sp		462.4	3947.45		75.8033	647.123		0.013192	0.0015453		0	68.747		0	NA		150512_091504_BDYXP1.eds
			Sp		462.4	386.264		75.8033	63.322		0.013192	0.0157923		0	6.727		0	NA		150513_122220_BDYT4A.eds
