# Supplementary material for: Cell-free DNA mutations as biomarkers in breast cancer patients receiving tamoxifen
Source: Oncotarget. 2016 May 30;7(28):43412–8. doi: 10.18632/oncotarget.9727 (PMC5190033; doi:10.18632/oncotarget.9727)
Supplement: Supplementary file 9 [file oncotarget-07-43412-s009.xlsx]

## Sheet: Sheet1
	Patient	Specimen #	Biopsy date	Follow-up		Biopsy time intervals ( in months)
				Response to tamoxifen @
						Tissue (pT) -liquid (Ss) biopsy	First (Ss) - Second (St) liquid biopsy	Second (St) - Third (Sp) liquid biopsy
	1	pT	July, 1987	9 years
		Ss	June, 1995	6 months SD		95
		St	October, 1995				4
		Sp	January, 1996					3
	2	pT	August, 1990	7 years
		Ss	June, 1996	13 months SD		70
		St	June, 1997				12
		Sp	August, 1997					3
	3	pT	July, 1983	12 years
		Ss	December, 1993	24 months SD		125
		St	August, 1995				20
		Sp	December, 1995					5
	4	pT	June, 1985	12 years
		Ss	May, 1994	36 months SD		107
		St	February, 1997				33
		Sp	June, 1997					5
	5	pT	May, 1990	5 years
		Ss	October, 1994	13 months PR		54
		St	June, 1995				8
		Sp	October, 1995					5
	6	pT	May, 1990	6 years
		Ss	December, 1994	22 months SD		56
		St	April, 1996				16
		Sp	October, 1996					7
	7	pT	March, 1987	8 years
		Ss	June, 1994	15 months SD		87
		St	June, 1995				12
		Sp	September, 1995					3
	8	pT	July, 1987	10 years
		Ss	April, 1996	15 months SD		104
		St	June, 1997				13
		Sp	August, 1997					3
	9	pT	August, 1990	3 years
		Ss	March, 1993	6 months SD		31
		St	June, 1993				3
		Sp	September, 1993					3
	10	pT	October, 1986	8 years
		Ss	June, 1992	25 months SD		32
		St	January, 1994				19
		Sp	June, 1994					6
	# Abbreviation for biopsy specimen: Primary tumor tissue (pT), serum at start of therapy (Ss), serum during treatment (St), and serum at disease progression (Sp).
	@ Response to first-line tamoxifen assessed by RECIST criteria and defined as stable disease (SD) or partial response (PR).
